# Supplementary material for: Prevalence of Anxiety in Dental Students during the COVID-19 Outbreak: A Meta-Analysis
Source: MDPI journal article supplement (doi:10.3390/ijerph182010978), 2021-10-19
Supplement: s1 [file s1]

**Supplementary Table S2.** Quality assessment.

| Study                                     | 1 | 2 | 3 | 4 | 5 | 6 | 7 | 8 | 9 | TOTAL |
|-------------------------------------------|---|---|---|---|---|---|---|---|---|-------|
| Akinkugbe <i>et al.</i> (2021)            | Y | N | N | Y | Y | Y | Y | Y | Y | 7     |
| Cayo-Rojas <i>et al.</i> (2021)           | Y | N | Y | Y | Y | Y | Y | Y | U | 7     |
| Chi <i>et al.</i> (2021)                  | Y | N | N | Y | Y | Y | Y | Y | N | 6     |
| dos Santos-Fernandez <i>et al.</i> (2021) | Y | U | Y | Y | Y | Y | Y | Y | U | 7     |
| El Homossany <i>et al.</i> (2021)         | N | N | Y | Y | Y | Y | Y | Y | Y | 7     |
| Gaş <i>et al.</i> (2021)                  | Y | Y | Y | Y | Y | Y | Y | Y | Y | 9     |
| Generali <i>et al.</i> (2020)             | Y | N | Y | Y | Y | Y | Y | Y | Y | 8     |
| Hakami <i>et al.</i> (2021)               | Y | Y | Y | Y | Y | Y | Y | Y | U | 8     |
| Keskin (2021)                             | N | N | N | Y | Y | Y | Y | Y | U | 5     |
| Kwaik <i>et al.</i> (2021)                | Y | U | Y | Y | Y | Y | Y | Y | Y | 8     |
| Lingawi & Afifi (2020)                    | Y | U | N | Y | Y | Y | Y | Y | U | 6     |
| Mekhemar <i>et al.</i> (2021)             | Y | N | N | N | Y | Y | Y | Y | U | 5     |
| Saddik <i>et al.</i> (2020)               | U | N | N | N | Y | Y | Y | Y | U | 4     |
| Samsudin <i>et al.</i> (2021)             | Y | N | N | N | Y | Y | Y | Y | Y | 6     |
| Siddiqui & Qian (2021)                    | Y | N | Y | Y | Y | Y | Y | Y | N | 7     |

Abbreviations: N: No, Y: Yes, U: Unclear; 1: Was the sample frame appropriate to address the target population?; 2: Were study participants recruited in an appropriate way?; 3: Was the sample size adequate?; 4: Were the study subjects and setting described in detail?; 5: Was data analysis conducted with sufficient coverage of the identified sample?; 6: Were valid methods used for the identification of the condition?; 7: Was the condition measured in a standard, reliable way for all participants?; 8: Was there appropriate statistical analysis?; 9: Was the response rate adequate, and if not, was the low response rate managed appropriately?
